# Supplementary material
Source: MDPI journal article supplement (https://www.mdpi.com/2071-1050/10/5/1387)
Supplement: s1 [file s1]

# Supplementary materials

**Table S1.** Description of the sustainability indicators.

| Category                                      | No        | Indicators                           | Max/<br>Min | Unit of<br>Measuring       | Description                                                                                                                                                                                                                                                                                                                                                   |
|-----------------------------------------------|-----------|--------------------------------------|-------------|----------------------------|---------------------------------------------------------------------------------------------------------------------------------------------------------------------------------------------------------------------------------------------------------------------------------------------------------------------------------------------------------------|
| <b>Environmental sustainability dimension</b> |           |                                      |             |                            |                                                                                                                                                                                                                                                                                                                                                               |
| Land use<br>considerations                    | $q_{el1}$ | Appropriate site<br>selection        | Max         | Points                     | The selected site for housing development project should meet municipal regulations, environmental context and reflect the particular needs of the population. Qualitative indicator assessed in 10-point scale by experts: 1 = site is not appropriate for the housing project, 10 = site is perfectly selected, meets all the above-mentioned requirements. |
|                                               | $q_{el2}$ | Developing<br>damaged areas          | Max         | Points                     | The project helps revive the damaged area. Qualitative indicator assessed in 10-point scale by experts: 1 = project is not developed in the damaged area, 10 = project is implemented in the damaged area, advanced conversion solutions applied.                                                                                                             |
|                                               | $q_{el3}$ | Landscape design                     | Max         | Points                     | Quality of landscape design. Qualitative indicator assessed in 10-point scale by experts: 1 = lowest quality landscape solutions, 10 = highest quality landscape solutions (compatible with nature, includes flower and rock gardens, etc.).                                                                                                                  |
|                                               | $q_{el4}$ | Ecosystem<br>preservation            | Max         | Points                     | The project aims at preserving a natural ecosystem. Qualitative indicator assessed in 10-point scale by experts: 1 = no ecosystem preservation solutions, 10 = the project is strongly focused on ecosystem preservation.                                                                                                                                     |
|                                               | $q_{el5}$ | Quality of<br>outdoor<br>environment | Max         | Points                     | Qualitative indicator assessed in 10-point scale by experts: 1 = the poorest outdoor environment, 10 = the highest level outdoor environment (private courtyard, children's playground, fitness equipment, etc.).                                                                                                                                             |
|                                               | $q_{el6}$ | Housing density                      | Max         | Number/<br>km <sup>2</sup> | Density of houses in the district /neighborhood. Higher density is preferred.                                                                                                                                                                                                                                                                                 |
|                                               | $q_{el7}$ | Infrastructure<br>efficiency         | Max         | Points                     | Qualitative indicator assessed in 10-point scale by experts: 1 = undeveloped infrastructure, 10 = perfectly developed infrastructure (roads, sidewalks, street lighting, etc.)                                                                                                                                                                                |
| Water<br>efficiency<br>considerations         | $q_{ew1}$ | Quality of potable<br>water          | Max         | Points                     | Quality of potable water assessed according to the results of toxic, indicatory and microbiological laboratory experiments. Qualitative indicator assessed in 10-point scale: 1 = the lowest quality of potable water, 10 = the highest quality of potable water.                                                                                             |

| Category                             | No        | Indicators                                     | Max/Min | Unit of Measuring | Description                                                                                                                                                                                                                                                       |
|--------------------------------------|-----------|------------------------------------------------|---------|-------------------|-------------------------------------------------------------------------------------------------------------------------------------------------------------------------------------------------------------------------------------------------------------------|
|                                      | $q_{ew2}$ | Implementation of alternative water resources  | Max     | Points            | Implementation of alternative water resources (e.g. reuse of rain and grey water). Qualitative indicator assessed in 10-point scale by experts: 1 = no alternative water solutions, 10 = advanced alternative water solutions.                                    |
|                                      | $q_{ew3}$ | Water conservation                             | Max     | Points            | Water conservation solutions. Qualitative indicator assessed in 10-point scale by experts: 1 = no water conservation solutions, 10 = advanced water conservation solutions.                                                                                       |
| Energy and atmosphere considerations | $q_{ee1}$ | Energy efficiency of housing                   | Max     | Points            | Energy efficiency class directly influences energy savings and economy of heating costs. Assessed in points according to the class: A++ class = 6 points; A+ class = 5 points; A class = 4 points; B class = 3 points; C class = 2 points; lower class = 1 point. |
|                                      | $q_{ee2}$ | Lighting efficiency                            | Max     | Points            | Lighting efficiency directly influences energy consumption. Qualitative indicator assessed in 10-point scale by experts: 1 = the lowest lighting efficiency, 10 = the highest lighting efficiency (use of natural lighting, LED bulbs, etc.).                     |
|                                      | $q_{ee3}$ | Renewable energy use                           | Max     | Points            | Renewable energy solutions (i.e. photovoltaics, wind energy). Qualitative criterion assessed in 10-point scale by experts: 1 = no renewable energy solutions, 10 = advanced renewable energy solutions.                                                           |
|                                      | $q_{ee4}$ | Greenhouse gas emission                        | Min     | Tons/year         | Greenhouse gas emission from heating. Calculated according to national standards.                                                                                                                                                                                 |
| Materials and waste management       | $q_{em1}$ | Use of materials with low environmental impact | Max     | Points            | Qualitative criterion assessed in 10-point scale by experts: 1 = environmentally friendly materials are not used, 10 = high quality environmentally friendly materials used.                                                                                      |
|                                      | $q_{em2}$ | Use of regional/local materials                | Max     | Percentage        | Use of local materials in construction. Percentage of local materials used in construction of the building.                                                                                                                                                       |
|                                      | $q_{em3}$ | Materials and products reused                  | Max     | Percentage        | Percentage of reused materials in construction of the building.                                                                                                                                                                                                   |
|                                      | $q_{em4}$ | Availability of waste management facilities    | Max     | Points            | Qualitative indicator assessed in 10-point scale by experts: 1 = no waste management facilities, 10 = high quality waste management facilities, including recycling facilities.                                                                                   |
| Indoor environmental quality         | $q_{ei1}$ | Thermal comfort and control                    | Max     | Points            | Qualitative indicator assessed in 10-point scale by experts: 1 = thermal comfort does not satisfy norms, no control opportunities, 10 = the highest level thermal comfort, advanced control solutions.                                                            |
|                                      | $q_{ei2}$ | Indoor air quality (IAQ) solutions             | Max     | Points            | Refers to the air quality within and around a building, especially as it relates to the health and comfort of building occupants. Source control, filtration and the use of                                                                                       |

| Category                                     | No        | Indicators                         | Max/<br>Min | Unit of<br>Measuring | Description                                                                                                                                                                                                                                                                                     |
|----------------------------------------------|-----------|------------------------------------|-------------|----------------------|-------------------------------------------------------------------------------------------------------------------------------------------------------------------------------------------------------------------------------------------------------------------------------------------------|
|                                              |           |                                    |             |                      | ventilation to dilute contaminants are the primary methods for improving indoor air quality in most buildings. Qualitative indicator assessed in 10-point scale by experts: 1 = the lowest IAQ, no improvement solutions, 10 = the highest level IAQ, advanced improvement solutions.           |
|                                              | $q_{ei3}$ | Lighting comfort                   | Max         | Points               | Qualitative indicator assessed in 10-point scale by experts: 1 = the lowest lighting comfort, 10 = the highest lighting comfort (satisfies requirements, natural lighting is used, advanced lighting solutions, etc.).                                                                          |
|                                              | $q_{ei4}$ | Visual comfort                     | Max         | Points               | Visual comfort depends on the interior design solutions and aesthetics. Qualitative indicator assessed in 10-point scale by experts: 1 = the lowest visual comfort, partial finishing, 10 = the highest visual comfort, design by famous designers, etc.                                        |
|                                              | $q_{ei5}$ | Aural comfort                      | Max         | Points               | Building walls and floor systems have to be designed with sufficient sound absorption capability to sustain suitable acoustical quality for occupants and neighbors. Qualitative indicator assessed in 10-point scale by experts: 1 = the lowest aural comfort, 10 = the highest aural comfort. |
| External pollution                           | $q_{ep1}$ | Pollution by NO <sub>2</sub>       | Min         | µg/m <sup>3</sup>    | Measured according to the national pollution maps.                                                                                                                                                                                                                                              |
|                                              | $q_{ep2}$ | Pollution by CO                    | Min         | µg/m <sup>3</sup>    | Measured according to the national pollution maps.                                                                                                                                                                                                                                              |
|                                              | $q_{ep3}$ | Noise pollution                    | Min         | dB                   | Measured according to the national noise maps.                                                                                                                                                                                                                                                  |
|                                              | $q_{ep4}$ | Pollution reduction considerations | Max         | Points               | Pollution reduction solutions in the project design. Qualitative indicator assessed in 10-point scale by experts: 1 = no pollution reduction solutions, 10 = advanced pollution reduction solutions.                                                                                            |
| Innovation and design process considerations | $q_{ed1}$ | Innovation in design               | Max         | Points               | Innovative solutions in design, application of “smart house” systems, etc. Qualitative indicator assessed in 10-point scale by experts: 1 = the lowest innovativeness, 10 = the highest innovativeness.                                                                                         |
|                                              | $q_{ed2}$ | Environmentally friendly design    | Max         | Points               | Eco-friendly design is an approach to design buildings with special consideration for the environmental impacts. Qualitative indicator assessed in 10-point scale by experts: 1 = no eco design solutions, 10 = advanced eco design solutions.                                                  |
|                                              | $q_{ed3}$ | Quality of facilities /equipment   | Max         | Points               | Quality of internal equipment, including heating and cooling equipment and home appliances. Qualitative indicator assessed in 10-point scale by experts: 1 = no equipment, 10 = advanced energy efficient                                                                                       |

| Category                               | No         | Indicators                                                | Max/<br>Min | Unit of<br>Measuring          | Description                                                                                                                                                                                                                                                                                                                                                                                                                                                                                                                                                             |
|----------------------------------------|------------|-----------------------------------------------------------|-------------|-------------------------------|-------------------------------------------------------------------------------------------------------------------------------------------------------------------------------------------------------------------------------------------------------------------------------------------------------------------------------------------------------------------------------------------------------------------------------------------------------------------------------------------------------------------------------------------------------------------------|
|                                        |            |                                                           |             |                               | equipment.                                                                                                                                                                                                                                                                                                                                                                                                                                                                                                                                                              |
|                                        | $q_{ed4}$  | Architectural heritage considerations                     | Max         | Points                        | Architectural heritage considerations focus on prevention of negative impact of project development on any kind of cultural heritage. Qualitative indicator assessed in 10-point scale by experts: 1 = no solutions for architectural heritage preservation, 10 = advanced architectural heritage preservation solutions.                                                                                                                                                                                                                                               |
|                                        | $q_{ed5}$  | Architectural functionality, flexibility and adaptability | Max         | Points                        | Comfort of apartment to residents, expressed in terms of functionality, flexibility and adaptability. Functionality is the potential of the apartment to serve its functions; flexibility – the potential for spaces to be used in a variety of ways; adaptability is the potential for the apartment to be modified with relative ease to accommodate change. Qualitative indicator assessed in 10-point scale by experts: 1 = the lowest level of functionality, flexibility and adaptability, 10 = the highest level of functionality, flexibility and adaptability. |
| <b>Social sustainability dimension</b> |            |                                                           |             |                               |                                                                                                                                                                                                                                                                                                                                                                                                                                                                                                                                                                         |
| Accessibilities                        | $q_{sa1}$  | Distance to the city center                               | Min         | km                            | The distance to the geographical city center, expressed in kilometers.                                                                                                                                                                                                                                                                                                                                                                                                                                                                                                  |
|                                        | $q_{sa2}$  | Access to public transportation                           | Min         | m                             | The distance to the nearest public transport station, expressed in meters.                                                                                                                                                                                                                                                                                                                                                                                                                                                                                              |
|                                        | $q_{sa3}$  | Access to employment opportunities                        | Max         | Number per 1000 residents     | Number of jobs per 1000 residents in the district. Assessed from national statistical bureaus' data.                                                                                                                                                                                                                                                                                                                                                                                                                                                                    |
|                                        | $q_{sa4}$  | Access to educational institutions                        | Min         | m                             | The distance to the nearest school, expressed in meters.                                                                                                                                                                                                                                                                                                                                                                                                                                                                                                                |
|                                        | $q_{sa5}$  | Access to shops                                           | Min         | m                             | The distance to the nearest supermarket, expressed in meters.                                                                                                                                                                                                                                                                                                                                                                                                                                                                                                           |
|                                        | $q_{sa6}$  | Access to health care services                            | Min         | m                             | The distance to the nearest clinic, expressed in meters.                                                                                                                                                                                                                                                                                                                                                                                                                                                                                                                |
|                                        | $q_{sa7}$  | Access to child care                                      | Min         | m                             | The distance to the nearest kinder garden, expressed in meters.                                                                                                                                                                                                                                                                                                                                                                                                                                                                                                         |
|                                        | $q_{sa8}$  | Access to leisure facilities                              | Min         | m                             | The distance to the nearest leisure facilities, expressed in meters.                                                                                                                                                                                                                                                                                                                                                                                                                                                                                                    |
|                                        | $q_{sa9}$  | Access to open green public space                         | Min         | m                             | The distance to the nearest open green public space, expressed in meters.                                                                                                                                                                                                                                                                                                                                                                                                                                                                                               |
|                                        | $q_{sa10}$ | Car parking capacity                                      | Max         | Number                        | Number of car places at external parking                                                                                                                                                                                                                                                                                                                                                                                                                                                                                                                                |
| Neighborhood /community considerations | $q_{sn1}$  | Safety (crime rate)                                       | Min         | Crime rate per 1000 residents | Annual crime rate per 1000 residents in the district.                                                                                                                                                                                                                                                                                                                                                                                                                                                                                                                   |
|                                        | $q_{sn2}$  | Neighborhood reputation                                   | Max         | Points                        | Qualitative criterion assessed in 10-point scale by experts: 1 = very low neighborhood reputation, 10 = the highest neighborhood reputation (prestigious district)                                                                                                                                                                                                                                                                                                                                                                                                      |
|                                        | $q_{sn3}$  | Population density                                        | Min         | Residents number/             | Number of residents per km <sup>2</sup> in the district.                                                                                                                                                                                                                                                                                                                                                                                                                                                                                                                |

| Category                                 | No        | Indicators              | Max/<br>Min | Unit of<br>Measuring | Description                                                                                                                                                                                                                                                                                                                                                                                                                                                                                                                                                                                                                         |
|------------------------------------------|-----------|-------------------------|-------------|----------------------|-------------------------------------------------------------------------------------------------------------------------------------------------------------------------------------------------------------------------------------------------------------------------------------------------------------------------------------------------------------------------------------------------------------------------------------------------------------------------------------------------------------------------------------------------------------------------------------------------------------------------------------|
|                                          |           |                         |             | km <sup>2</sup>      |                                                                                                                                                                                                                                                                                                                                                                                                                                                                                                                                                                                                                                     |
|                                          | $q_{sn4}$ | Community cohesion      | Max         | Points               | Community cohesion describes the ability of all communities to function and grow in harmony together rather than in conflict. It aims at building communities where people feel confident that they belong and are comfortable mixing and interacting with others, particularly with people from different ethnic backgrounds or people of a different faith. Building cohesion within and between communities is an essential step towards improving people's quality of life. Qualitative indicator assessed in 10-point scale by experts: 1 = very weak community cohesion, 10 = very strong community cohesion in the district. |
|                                          | $q_{sn5}$ | Privacy                 | Max         | Points               | Qualitative indicator assessed in 10-point scale by experts: 1 = internal and external privacy is not ensured, 10 = the highest internal and external privacy ensured (i.e. private leisure zones, terraces, balconies).                                                                                                                                                                                                                                                                                                                                                                                                            |
| <b>Economic sustainability dimension</b> |           |                         |             |                      |                                                                                                                                                                                                                                                                                                                                                                                                                                                                                                                                                                                                                                     |
|                                          | $q_{e1}$  | Price of the apartment  | Min         | EUR/m <sup>2</sup>   | Average price of 1 m <sup>2</sup> of the apartment.                                                                                                                                                                                                                                                                                                                                                                                                                                                                                                                                                                                 |
|                                          | $q_{e2}$  | Housing affordability   | Min         | Number               | Number of average net wages needed to purchase 1 m <sup>2</sup> of the apartment.                                                                                                                                                                                                                                                                                                                                                                                                                                                                                                                                                   |
|                                          | $q_{e3}$  | Mortgage interest rates | Min         | Percentage           | Average interest rates paid for housing mortgage.                                                                                                                                                                                                                                                                                                                                                                                                                                                                                                                                                                                   |
|                                          | $q_{e4}$  | Value stability         | Max         | Percentage           | Probability that the value of the apartment will not change in the future. Assessed by experts.                                                                                                                                                                                                                                                                                                                                                                                                                                                                                                                                     |
|                                          | $q_{e5}$  | Added value             | Max         | Points               | Added value to local economy. Qualitative indicator assessed in 10-point scale by experts: 1 = the lowest added value, 10 = the highest added value.                                                                                                                                                                                                                                                                                                                                                                                                                                                                                |
|                                          | $q_{e6}$  | Satisfaction of demand  | Max         | Percentage           | Percentage of sold apartments.                                                                                                                                                                                                                                                                                                                                                                                                                                                                                                                                                                                                      |

**Table S2.** Normalized, weighted decision-making matrix and efficiency indexes (all categories).

| Category                               | Indicators                                     | LITHUANIA |       |       | LATVIA |       |       | ESTONIA |       |       |
|----------------------------------------|------------------------------------------------|-----------|-------|-------|--------|-------|-------|---------|-------|-------|
|                                        |                                                | A1        | A2    | A3    | A4     | A5    | A6    | A7      | A8    | A9    |
| Environmental sustainability dimension |                                                |           |       |       |        |       |       |         |       |       |
| Land use considerations                | Appropriate site selection                     | 0.203     | 0.152 | 0.203 | 0.152  | 0.177 | 0.203 | 0.228   | 0.228 | 0.203 |
|                                        | Developing damaged areas                       | 0.153     | 0.076 | 0.076 | 0.076  | 0.115 | 0.115 | 0.191   | 0.076 | 0.076 |
|                                        | Landscape design                               | 0.022     | 0.031 | 0.040 | 0.022  | 0.031 | 0.031 | 0.044   | 0.031 | 0.040 |
|                                        | Ecosystem preservation                         | 0.064     | 0.096 | 0.255 | 0.096  | 0.159 | 0.191 | 0.255   | 0.159 | 0.287 |
|                                        | Quality of outdoor environment                 | 0.044     | 0.061 | 0.070 | 0.044  | 0.061 | 0.061 | 0.087   | 0.070 | 0.078 |
|                                        | Housing density                                | 0.015     | 0.011 | 0.019 | 0.033  | 0.018 | 0.015 | 0.015   | 0.013 | 0.018 |
|                                        | Infrastructure efficiency                      | 0.129     | 0.103 | 0.116 | 0.090  | 0.090 | 0.103 | 0.129   | 0.103 | 0.116 |
| S <sub>j</sub>                         |                                                | 0.629     | 0.530 | 0.779 | 0.361  | 0.474 | 0.516 | 0.721   | 0.452 | 0.615 |
| Water efficiency considerations        | Quality of potable water                       | 0.633     | 0.562 | 0.703 | 0.633  | 0.633 | 0.703 | 0.633   | 0.703 | 0.703 |
|                                        | Implementation of alternative water resources  | 0.098     | 0.098 | 0.098 | 0.195  | 0.195 | 0.195 | 0.098   | 0.098 | 0.098 |
|                                        | Water conservation                             | 0.020     | 0.020 | 0.020 | 0.061  | 0.102 | 0.102 | 0.020   | 0.020 | 0.020 |
| S <sub>j</sub>                         |                                                | 0.751     | 0.680 | 0.821 | 0.889  | 0.930 | 1.000 | 0.751   | 0.821 | 0.821 |
| Energy and atmosphere considerations   | Energy efficiency of housing                   | 0.457     | 0.343 | 0.343 | 0.229  | 0.229 | 0.343 | 0.343   | 0.343 | 0.343 |
|                                        | Lighting efficiency                            | 0.031     | 0.055 | 0.043 | 0.031  | 0.031 | 0.055 | 0.049   | 0.049 | 0.055 |
|                                        | Renewable energy use                           | 0.236     | 0.030 | 0.030 | 0.030  | 0.059 | 0.030 | 0.030   | 0.030 | 0.295 |
|                                        | Greenhouse gas emission                        | 0.193     | 0.129 | 0.166 | 0.105  | 0.105 | 0.130 | 0.127   | 0.166 | 0.152 |
| S <sub>j</sub>                         |                                                | 0.917     | 0.556 | 0.581 | 0.394  | 0.423 | 0.557 | 0.548   | 0.587 | 0.845 |
| Materials and waste management         | Use of materials with low environmental impact | 0.421     | 0.361 | 0.541 | 0.361  | 0.421 | 0.481 | 0.481   | 0.481 | 0.541 |
|                                        | Use of regional/local materials                | 0.119     | 0.155 | 0.143 | 0.119  | 0.108 | 0.172 | 0.119   | 0.143 | 0.167 |
|                                        | Materials and products reused                  | 0.089     | 0.089 | 0.134 | 0.089  | 0.089 | 0.178 | 0.116   | 0.178 | 0.178 |
|                                        | Availability of waste management facilities    | 0.098     | 0.098 | 0.098 | 0.076  | 0.087 | 0.098 | 0.098   | 0.109 | 0.098 |
| S <sub>j</sub>                         |                                                | 0.727     | 0.703 | 0.916 | 0.645  | 0.704 | 0.929 | 0.814   | 0.911 | 0.984 |
| Indoor environmental quality           | Thermal comfort and control                    | 0.464     | 0.515 | 0.412 | 0.412  | 0.412 | 0.464 | 0.412   | 0.412 | 0.464 |
|                                        | Indoor air quality (IAQ) solutions             | 0.251     | 0.195 | 0.223 | 0.223  | 0.195 | 0.195 | 0.223   | 0.223 | 0.251 |
|                                        | Lighting comfort                               | 0.029     | 0.037 | 0.033 | 0.037  | 0.033 | 0.033 | 0.037   | 0.037 | 0.041 |
|                                        | Visual comfort                                 | 0.039     | 0.054 | 0.062 | 0.062  | 0.062 | 0.069 | 0.077   | 0.054 | 0.077 |
|                                        | Aural comfort                                  | 0.116     | 0.093 | 0.093 | 0.081  | 0.093 | 0.093 | 0.104   | 0.104 | 0.116 |
| S <sub>j</sub>                         |                                                | 0.898     | 0.894 | 0.822 | 0.815  | 0.794 | 0.854 | 0.853   | 0.830 | 0.949 |

| Category                                     | Indicators                                                | LITHUANIA    |              |              | LATVIA       |              |              | ESTONIA      |              |              |
|----------------------------------------------|-----------------------------------------------------------|--------------|--------------|--------------|--------------|--------------|--------------|--------------|--------------|--------------|
|                                              |                                                           | A1           | A2           | A3           | A4           | A5           | A6           | A7           | A8           | A9           |
| External pollution                           | Pollution by NO2                                          | 0.054        | 0.073        | 0.056        | 0.038        | 0.022        | 0.022        | 0.064        | 0.073        | 0.094        |
|                                              | Pollution by CO                                           | 0.095        | 0.124        | 0.107        | 0.111        | 0.107        | 0.107        | 0.072        | 0.090        | 0.050        |
|                                              | Noise pollution                                           | 0.101        | 0.067        | 0.085        | 0.068        | 0.056        | 0.063        | 0.072        | 0.130        | 0.095        |
|                                              | Pollution reduction considerations                        | 0.290        | 0.435        | 0.507        | 0.435        | 0.435        | 0.435        | 0.580        | 0.507        | 0.652        |
| <b>S<sub>j</sub></b>                         |                                                           | <b>0.539</b> | <b>0.698</b> | <b>0.756</b> | <b>0.652</b> | <b>0.621</b> | <b>0.627</b> | <b>0.787</b> | <b>0.800</b> | <b>0.891</b> |
| Innovation and design process considerations | Innovation in design                                      | 0.109        | 0.155        | 0.124        | 0.093        | 0.109        | 0.124        | 0.140        | 0.140        | 0.140        |
|                                              | Environmentally friendly design                           | 0.197        | 0.230        | 0.263        | 0.230        | 0.263        | 0.296        | 0.296        | 0.263        | 0.329        |
|                                              | Quality of facilities /equipment                          | 0.088        | 0.088        | 0.088        | 0.077        | 0.099        | 0.099        | 0.099        | 0.088        | 0.110        |
|                                              | Architectural heritage considerations                     | 0.073        | 0.088        | 0.102        | 0.117        | 0.117        | 0.117        | 0.146        | 0.117        | 0.117        |
|                                              | Architectural functionality, flexibility and adaptability | 0.208        | 0.208        | 0.234        | 0.182        | 0.234        | 0.208        | 0.234        | 0.208        | 0.260        |
| <b>S<sub>j</sub></b>                         |                                                           | <b>0.675</b> | <b>0.769</b> | <b>0.811</b> | <b>0.699</b> | <b>0.822</b> | <b>0.844</b> | <b>0.915</b> | <b>0.816</b> | <b>0.955</b> |
| <b>Social sustainability dimension</b>       |                                                           |              |              |              |              |              |              |              |              |              |
| Accessibilities                              | Distance to the city center                               | 0.034        | 0.013        | 0.057        | 0.009        | 0.023        | 0.021        | 0.026        | 0.006        | 0.011        |
|                                              | Access to public transportation                           | 0.082        | 0.056        | 0.131        | 0.049        | 0.010        | 0.049        | 0.098        | 0.163        | 0.196        |
|                                              | Access to employment opportunities                        | 0.238        | 0.103        | 0.115        | 0.051        | 0.051        | 0.053        | 0.090        | 0.102        | 0.110        |
|                                              | Access to educational institutions                        | 0.105        | 0.115        | 0.041        | 0.019        | 0.017        | 0.038        | 0.043        | 0.058        | 0.062        |
|                                              | Access to shops                                           | 0.011        | 0.015        | 0.012        | 0.035        | 0.008        | 0.015        | 0.018        | 0.026        | 0.016        |
|                                              | Access to health care services                            | 0.012        | 0.004        | 0.005        | 0.002        | 0.111        | 0.002        | 0.013        | 0.010        | 0.021        |
|                                              | Access to child care                                      | 0.001        | 0.001        | 0.001        | 0.002        | 0.001        | 0.105        | 0.001        | 0.001        | 0.002        |
|                                              | Access to leisure facilities                              | 0.003        | 0.008        | 0.014        | 0.014        | 0.014        | 0.014        | 0.023        | 0.056        | 0.020        |
|                                              | Access to open green public space                         | 0.002        | 0.062        | 0.062        | 0.004        | 0.003        | 0.003        | 0.016        | 0.031        | 0.012        |
|                                              | Car parking capacity                                      | 0.010        | 0.007        | 0.002        | 0.012        | 0.010        | 0.012        | 0.012        | 0.014        | 0.025        |
| <b>S<sub>j</sub></b>                         |                                                           | <b>0.497</b> | <b>0.385</b> | <b>0.439</b> | <b>0.197</b> | <b>0.247</b> | <b>0.314</b> | <b>0.340</b> | <b>0.468</b> | <b>0.475</b> |
| Neighborhood /community considerations       | Safety (crime rate)                                       | 0.146        | 0.326        | 0.283        | 0.170        | 0.136        | 0.227        | 0.486        | 0.352        | 0.200        |
|                                              | Neighborhood reputation                                   | 0.081        | 0.054        | 0.090        | 0.045        | 0.063        | 0.063        | 0.090        | 0.072        | 0.072        |
|                                              | Population density                                        | 0.025        | 0.013        | 0.030        | 0.059        | 0.059        | 0.059        | 0.033        | 0.027        | 0.032        |
|                                              | Community cohesion                                        | 0.127        | 0.190        | 0.169        | 0.084        | 0.084        | 0.148        | 0.169        | 0.169        | 0.148        |
|                                              | Privacy                                                   | 0.156        | 0.117        | 0.117        | 0.117        | 0.175        | 0.136        | 0.156        | 0.136        | 0.156        |
| <b>S<sub>j</sub></b>                         |                                                           | <b>0.535</b> | <b>0.700</b> | <b>0.689</b> | <b>0.475</b> | <b>0.518</b> | <b>0.633</b> | <b>0.933</b> | <b>0.756</b> | <b>0.608</b> |

| Category                          | Indicators              | LITHUANIA |       |       | LATVIA |       |       | ESTONIA |       |       |
|-----------------------------------|-------------------------|-----------|-------|-------|--------|-------|-------|---------|-------|-------|
|                                   |                         | A1        | A2    | A3    | A4     | A5    | A6    | A7      | A8    | A9    |
| Economic sustainability dimension |                         |           |       |       |        |       |       |         |       |       |
|                                   | Price of the apartment  | 0.037     | 0.041 | 0.034 | 0.055  | 0.035 | 0.033 | 0.021   | 0.025 | 0.019 |
|                                   | Housing affordability   | 0.219     | 0.241 | 0.200 | 0.243  | 0.177 | 0.133 | 0.230   | 0.271 | 0.208 |
|                                   | Mortgage interest rates | 0.155     | 0.174 | 0.155 | 0.161  | 0.161 | 0.161 | 0.136   | 0.155 | 0.174 |
|                                   | Value stability         | 0.055     | 0.032 | 0.052 | 0.055  | 0.055 | 0.055 | 0.058   | 0.058 | 0.055 |
|                                   | Added value             | 0.204     | 0.159 | 0.182 | 0.182  | 0.136 | 0.159 | 0.227   | 0.182 | 0.204 |
|                                   | Satisfaction of demand  | 0.214     | 0.199 | 0.175 | 0.201  | 0.088 | 0.107 | 0.214   | 0.193 | 0.161 |
| $S_j$                             |                         | 0.885     | 0.846 | 0.798 | 0.897  | 0.653 | 0.648 | 0.886   | 0.883 | 0.820 |

**Table S3.** Normalized, weighted decision-making matrix and efficiency indexes (environmental sustainability dimension).

| Category                                      | LITHUANIA    |              |              | LATVIA       |              |              | ESTONIA      |              |              |
|-----------------------------------------------|--------------|--------------|--------------|--------------|--------------|--------------|--------------|--------------|--------------|
|                                               | A1           | A2           | A3           | A4           | A5           | A6           | A7           | A8           | A9           |
| <b>Environmental sustainability dimension</b> |              |              |              |              |              |              |              |              |              |
| Land use considerations                       | 0.065        | 0.055        | 0.081        | 0.038        | 0.049        | 0.054        | 0.075        | 0.047        | 0.064        |
| Water efficiency considerations               | 0.025        | 0.022        | 0.027        | 0.029        | 0.031        | 0.033        | 0.025        | 0.027        | 0.027        |
| Energy and atmosphere considerations          | 0.327        | 0.199        | 0.207        | 0.140        | 0.151        | 0.199        | 0.195        | 0.209        | 0.301        |
| Materials and waste management                | 0.181        | 0.175        | 0.228        | 0.161        | 0.175        | 0.231        | 0.203        | 0.227        | 0.245        |
| Indoor environmental quality                  | 0.130        | 0.129        | 0.119        | 0.118        | 0.115        | 0.123        | 0.123        | 0.120        | 0.137        |
| External pollution                            | 0.076        | 0.098        | 0.106        | 0.092        | 0.087        | 0.088        | 0.111        | 0.112        | 0.125        |
| Innovation and design process considerations  | 0.037        | 0.043        | 0.045        | 0.039        | 0.046        | 0.047        | 0.051        | 0.045        | 0.053        |
| $S_j$                                         | <b>0.841</b> | <b>0.721</b> | <b>0.813</b> | <b>0.616</b> | <b>0.654</b> | <b>0.775</b> | <b>0.782</b> | <b>0.788</b> | <b>0.953</b> |

**Table S4.** Normalized, weighted decision-making matrix and efficiency indexes (social sustainability dimension).

| Category                               | LITHUANIA    |              |              | LATVIA       |              |              | ESTONIA      |              |              |
|----------------------------------------|--------------|--------------|--------------|--------------|--------------|--------------|--------------|--------------|--------------|
|                                        | A1           | A2           | A3           | A4           | A5           | A6           | A7           | A8           | A9           |
| <b>Social sustainability dimension</b> |              |              |              |              |              |              |              |              |              |
| Accessibilities                        | 0.697        | 0.540        | 0.616        | 0.276        | 0.346        | 0.440        | 0.477        | 0.656        | 0.666        |
| Neighborhood/community considerations  | 0.174        | 0.227        | 0.224        | 0.154        | 0.168        | 0.205        | 0.303        | 0.246        | 0.197        |
| $S_j$                                  | <b>0.871</b> | <b>0.767</b> | <b>0.839</b> | <b>0.431</b> | <b>0.514</b> | <b>0.646</b> | <b>0.780</b> | <b>0.902</b> | <b>0.863</b> |

**Table S5.** Normalized, weighted decision-making matrix and efficiency indexes (overall ranking).

| Dimension                    | LITHUANIA    |              |              | LATVIA       |              |              | ESTONIA      |              |              |
|------------------------------|--------------|--------------|--------------|--------------|--------------|--------------|--------------|--------------|--------------|
|                              | A1           | A2           | A3           | A4           | A5           | A6           | A7           | A8           | A9           |
| Environmental sustainability | 0.429        | 0.368        | 0.415        | 0.314        | 0.334        | 0.395        | 0.399        | 0.402        | 0.486        |
| Social sustainability        | 0.238        | 0.209        | 0.229        | 0.117        | 0.140        | 0.176        | 0.213        | 0.246        | 0.236        |
| Economic sustainability      | 0.264        | 0.253        | 0.238        | 0.268        | 0.195        | 0.194        | 0.265        | 0.264        | 0.245        |
| $S_j$                        | <b>0.931</b> | <b>0.830</b> | <b>0.882</b> | <b>0.700</b> | <b>0.669</b> | <b>0.765</b> | <b>0.877</b> | <b>0.912</b> | <b>0.967</b> |

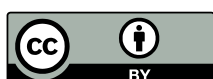

© 2018 by the authors. Submitted for possible open access publication under the terms and conditions of the Creative Commons Attribution (CC BY) license (<http://creativecommons.org/licenses/by/4.0/>).
